# Supplementary material for: Fabrication of magnetically recyclable Ag/Cu@Fe3O4nanoparticles with excellent catalytic activity for p-nitrophenol reduction
Source: Royal Society of Chemistry journal article supplement (doi:10.1039/c4ra05514d), 2014-08-26
Supplement: c4ra05514d1.pdf [file c4ra05514d1.pdf]

## Supplementary information

### **Fabrication of magnetically recyclable Ag/Cu@Fe<sub>3</sub>O<sub>4</sub> nanoparticles with excellent catalytic activity for p-nitrophenol reduction**

Yongli Zhang<sup>1,2</sup>, Weiwei Yan<sup>1,2</sup>, Zhiming Sun<sup>1,2\*</sup>, Xichuan Li<sup>3</sup>, Jianping Gao<sup>3\*</sup>

(<sup>1</sup>Huanhu Hospital, Tianjin 300060; <sup>2</sup>Tianjin cerebral vascular and neural

Degenerative disease key laboratory, Tianjin 300060; <sup>3</sup>School of Science, Tianjin

University, Tianjin 300072, P R China)

### **Characterization**

The Ag/Cu@Fe<sub>3</sub>O<sub>4</sub> solid was grinded into powder with a mortar after it was dried in vacuum, which facilitate subsequent tests.

For FTIR, lots of KBr powder and little of solid were mixed and added in a mortar. They were grinded into ultrafine powder and then fully dried under lamp to remove absorbed water. But it is noticed that the drying temperature should not be too high. Dried sample powder was then transferred to an assembly mold, followed by pressuring for one minute. After the pressure was gradually reduced to zero, the prepared sample was carefully taken out and put in the holder.

For TEM, a little of products were dispersed in ethanol and sonicated for 30 min. Then drops of the aqueous suspension were placed onto carbon coated copper grids. They were dried under ambient conditions prior to being introduced into the TEM chamber for observation.
